# Supplementary material for: Catalase-driven protein microtube motors with different exterior surfaces as ultrasmall biotools
Source: Royal Society of Chemistry journal article supplement (doi:10.1039/d1ma00610j), 2021-01-01
Supplement: d1ma00610j1.pdf [file d1ma00610j1.pdf]

= Electronic supplementary information =

# Catalase-driven protein microtubule motors with different exterior surfaces as ultras-small biotools

Mizuki Umehara, Natsuho Sugai, Kohei Murayama, Tomonao Sugawara, Yushi Akashi,  
Yoshitsugu Morita, Ryo Kato and Teruyuki Komatsu\*

*Department of Applied Chemistry, Faculty of Science and Engineering, Chuo University, 1-  
13-27 Kasuga, Bunkyo-ku, Tokyo 112-8551, Japan*

Corresponding author: Prof. Teruyuki Komatsu

Tel & Fax: +81-3-3817-1910, E-mail: komatsu@kc.chuo-u.ac.jp

## Experimental section

### **F-*E. coli* survival tests in the HEPES solution containing H<sub>2</sub>O<sub>2</sub> and Triton X-100**

The F-*E. coli* suspension (OD<sub>600</sub> = 0.05, 0.2 mL) was added to the HEPES solution (pH 6.8, 10 mM, + 1 mM CaCl<sub>2</sub>, +1 mM MnCl<sub>2</sub>, 0.8 mL) (working solution) and the resultant mixture ([F-*E. coli*] = 5.0 × 10<sup>6</sup> cells/mL) was incubated for 5, 15, 30, 60, 90, 120, 150, and 180 min. After centrifugation (4000 × g, 10 min), the supernatant was removed and the precipitated cells were redispersed in HEPES solution (1 mL). Then the fluorescent spectrum was measured (λ<sub>ex</sub>, 395 nm). The fluorescent intensity (λ<sub>em</sub>, 508 nm) of the F-*E. coli* sample exposed in the working solution for 15 min was 93% of that of the control sample (without exposure to the working solution). In contrast, the fluorescent intensity of the F-*E. coli* sample exposed in the working solution for 180 min was 48% of the control.

The F-*E. coli* suspension (OD<sub>600</sub> = 4.00, 0.2 mL) was added to the working solution and mixed well ([F-*E. coli*] = 4.0 × 10<sup>8</sup> cells/mL). After 5, 15, and 30 min, the sample (50 μL) was pipetted out and dispersed into saline solution (50 mL). After centrifugation (1500 × g, 30 min, 4 °C), the precipitated cells were dispersed in LB/ampicillin medium (5 mL) and the obtained mixture was incubated in a shaking incubator at 37 °C. To observe the culturability, the OD<sub>600</sub> value was monitored for 24 h. The OD<sub>600</sub> of the F-*E. coli* sample exposed in the working solution for 15 min reached the same value of the control sample (without exposure to the working solution) after 24 h. In contrast, the OD<sub>600</sub> of the sample exposed in the working solution for 30 min reached only 70% of the control. These results suggest that a large fraction of F-*E. coli* in the working solution were expected to remain viable and culturable within 15 min. Certainly, these survival tests have limitation. However, the Con A-LPS binding allows the tube to capture F-*E. coli* regardless of their bacterial viability or culturability.

### **Synthesis of αGD-covered Cat MTs (αGD/Cat MTs)**

The Avi MTs (ca. 8.23 × 10<sup>6</sup> tubes, one-sixth of the powder prepared using one PC membrane) were dispersed in deionized water (1.7 mL) using an ultrasonic cleaner for 1 min. To this dispersion, the 20× PBS solution (pH 7.4, 0.1 mL) and 9% NaCl solution (195 μL) was added, and the mixture was incubated for 30 min at 25°C. Then the PB solution (pH 7.0, 10 mM, 4.74 μL) of bCat (15.9 μM) was

injected into the dispersion, and the resultant mixture (ca.  $4.12 \times 10^6$  tubes/mL, [bCat] = 37.7 nM, [bCat]/[Avi] = 2.0 (mol/mol), PBS +150 mM NaCl, 2 mL) was incubated for 3 h at 25°C under the darkness. The Cat MTs were collected at the bottom using a Nd-magnet and the supernatant was removed. The precipitated tubes were resuspended in PB solution (2 mL) and collected again by a magnet. After removing the supernatant, PB solution was added to adjust the volume of 0.35 mL (ca.  $2.35 \times 10^7$  tubes/mL). Subsequently, the PB solution of  $\alpha$ GD (1 mg/mL, 0.15 mL) was added and the obtained mixture was incubated for 30 min at 25°C. Then the MTs were collected by a magnet and the supernatant was discarded, followed by adding PB solution (0.5 mL). By repeating this washing cycle two times, we obtained the PB solution (0.5 mL) of  $\alpha$ GD/PLA/HSA/MNP(PLA/HSA)<sub>5</sub>PLA/PLG/Avi/bCat MTs ( $\alpha$ GD/Cat MTs). Using the same procedure,  $\alpha$ GD/PLA/HSA/MNP(PLA/HSA)<sub>5</sub>PLA/PLG MTs ( $\alpha$ GD/PLG MTs) were also prepared.

#### **Coverage rate estimation with $\alpha$ GD**

The coverage rate of the outer surface of Cat MTs with  $\alpha$ GD was estimated by the same procedure of CyConA/Cat MTs using a fluorescent F $\alpha$ GD. To the PB solution (pH 7.0, 10 mM, 0.35 mL) of Cat MTs (ca.  $2.35 \times 10^7$  tubes/mL) prepared as described above, the PB solution of F $\alpha$ GD (0.04 mg/mL, 0.15 mL) was added and the mixture was incubated for 30 min at 25°C. The F $\alpha$ GD/Cat MTs were then collected by a Nd-magnet, and the fluorescent spectrum of the supernatant (0.1 mL) was measured ( $\lambda_{\text{ex}}$ , 495 nm /  $\lambda_{\text{em}}$ , 525 nm) to ascertain the concentration of the unbound F $\alpha$ GD. An identically treated control F $\alpha$ GD sample without MT was prepared; its fluorescence intensity was regarded as a 100% F $\alpha$ GD concentration.

#### **Maximum amount of proteins absorbed on the exterior surface of Cat MT**

Maximum amount of protein (ConA,  $\alpha$ GD, HRP) ( $N$  mol) that can be absorbed on the exterior surface of Cat MT was calculated using (eqn (S1)).

$$N = \left\{ \pi \left( \frac{D}{2} + T \right)^2 - \pi \left( \frac{D}{2} \right)^2 \right\} \times L \times d / M_w \quad (S1)$$

*D*: O.D. of Cat MT in swelled state in water.

*T*: Thicknesses (diameter) of protein absorbed on the exterior surface of Cat MT in swelled state in water.

*L*: T.L. of Cat MT.

*d*: Density of protein absorbed on the exterior surface of Cat MT.

*M<sub>w</sub>*: Molecular weight of protein absorbed on the exterior surface of Cat MT.

### **Synthesis of HRP-covered Cat MTs (HRP/Cat MTs)**

The PB dispersion (pH 7.0, 10 mM, 2.0 mL) of Cat MTs (ca.  $4.12 \times 10^6$  tubes/mL) was prepared as described above. Using a Nd-magnet, the MTs were collected at the bottom and the supernatant was removed. Subsequently, the precipitated tubules were resuspended in PB solution of HRP (0.2  $\mu$ M, 0.5 mL) and the mixture was incubated for 30 min at 25°C. The MTs were attracted by a magnet and the supernatant was discarded, followed by adding PB solution (0.5 mL). By repeating this washing two times, we obtained the PB solution (0.5 mL) of HRP/PLA/HSA/MNP(PLA/HSA)<sub>5</sub>PLA/PLG/Avi/bCat MTs (HRP/Cat MTs). Using the same procedure, HRP/PLA/HSA/MNP(PLA/HSA)<sub>5</sub>PLA/PLG/Avi/HSA MTs (HRP/HSA MTs) were prepared from HSA MTs.

### **Coverage rate estimation with HRP**

The coverage rate of the outer surface of Cat MTs with HRP was estimated by the same procedure of F $\alpha$ GD/Cat MTs using a fluorescent CyHRP. An identically treated control CyHRP sample without MTs was prepared; its fluorescence intensity was regarded as a 100% CyHRP concentration.

### **Synthesis of AuNP-coated Cat MTs (AuNP/Cat MTs)**

The another precursor MTs [(PLA/HSA)<sub>7</sub>PLA/PLG/Avi MTs] without MNP layer were synthesized according to the same procedure described in materials and methods section using a PC membrane (1.2

$\mu\text{m}$  pore-diameter,  $4.94 \times 10^7$  pores/piece; Millipore Corp.) (Fig. S4). The MTs (ca.  $8.23 \times 10^6$  tubes, one-sixth of the powder prepared using one PC membrane) were dispersed in deionized water (1.7 mL) using an ultrasonic cleaner for 1 min. This dispersion was divided into two. To each dispersion, the  $20\times$  PBS solution (pH 7.4, 50  $\mu\text{L}$ ) and 9% NaCl solution (97.5  $\mu\text{L}$ ) was added, and the mixture was incubated for 15 min at  $25^\circ\text{C}$ . Then, the PB solution (pH 7.0, 10 mM, 2.2  $\mu\text{L}$ ) of bCat (15.9  $\mu\text{M}$ ) was injected to the dispersion, and the resultant mixture (ca.  $4.12 \times 10^6$  tubes/mL, [bCat] = 35 nM, [bCat]/[Avi] = 1.9 (mol/mol), PBS +150 mM NaCl) was incubated for 3 h at  $25^\circ\text{C}$  under the darkness. After centrifugation ( $1000 \times g$ , 10 min), the supernatant including unbound bCat was discarded. The precipitated (PLA/HSA)<sub>7</sub>PLA/PLG/Avi/bCat MTs (Cat2 MTs) were redispersed in deionized water and centrifuged again ( $1000 \times g$ , 10 min). After removing the supernatant, the precipitated tubes in 50  $\mu\text{L}$  solution were suspended in aqueous dispersion of AuNP (0.25 mg/mL, 0.5 mL) and the mixture (0.55 mL) was incubated for 30 min at  $25^\circ\text{C}$ . Then the dispersion was centrifuged ( $500 \times g$ , 1 min) to remove the supernatant and the precipitated MTs were dispersed in deionized water (0.5 mL). The dispersion was centrifuged again ( $500 \times g$ , 1 min) and the supernatant was removed. Next, the precipitate MTs were suspended in PB solution (pH 7.0, 10 mM) and centrifuged ( $500 \times g$ , 1 min) to remove the supernatant. After repeating this washing with PB solution two times, the volume was adjusted to 2.0 mL, yielding AuNP/(PLA/HSA)<sub>7</sub>PLA/PLG/Avi/bCat MTs (AuNP/Cat MTs).

### **Coverage rate estimation with AuNP**

The initial supernatant (0.3 mL) removed from the mixture solution of Cat2 MTs and AuNPs after the centrifugation was diluted with 1.2 mL water (5-fold dilution). The UV-vis absorption spectrum of this solution was measured to assay the concentration of the unbound free AuNPs. An identically treated control AuNP sample without MTs was also prepared; its absorption intensity at 530 nm was regarded as a 100% AuNP concentration.

### **Scanning electron microscopy (SEM), transmission electron microscopy (TEM), and confocal laser scanning microscopy (CLSM)**

SEM, TEM, and CLSM observations of the MTs were performed as described in our previous paper.<sup>26</sup> The SEM measurements were conducted using a field-emission scanning electron microscope (S-4300; Hitachi High-Technologies Corp.) with an accelerating voltage of 10 kV. The TEM measurements were performed using a transmission electron microscope (HT-7700; Hitachi High-Technologies Corp.) with an accelerating voltage of 100 kV. The CLSM measurements were carried out using a laser scanning microscope (LSM 510; Carl Zeiss Inc.). Fluorescein labeled materials were imaged using Ar<sup>+</sup> laser ( $\lambda_{\text{ex}}$ , 488 nm / LP505 filter) and Cy5.5 labeled materials were imaged using He-Ne laser ( $\lambda_{\text{ex}}$ , 633 nm / LP650 filter).

### **Digestion of MTs**

The PB solution (pH 7.0, 10 mM, 50  $\mu\text{L}$ ) of ConA/Cat MTs,  $\alpha\text{GD}/\text{Cat}$  MTs, HRP/Cat MTs, and AuNP/Cat MTs were mixed, respectively, with Tris-HCl buffer solution (pH 7.5, 50 mM, 50  $\mu\text{L}$ ) of Pronase (Roche Diagnostics GmbH) (5 mg/mL). The 6  $\mu\text{L}$  of the mixture was placed onto the slide glass and was sealed by a cover glass with colorless resin. The time-course of the morphology change at 37 °C was observed using a research inverted microscope. After 2 h, the mixture was sonicated briefly and was observed using microscope.

## Results

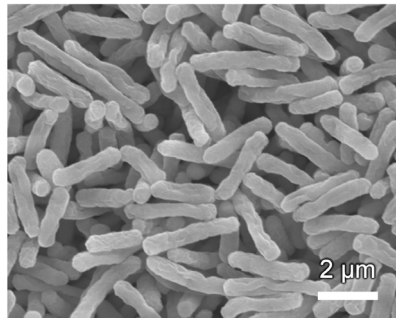

**Fig. S1** SEM image of F-*E. coli*.

 : Part of enzyme facing the aqueous phase  
 : Part of enzyme facing the tube surface

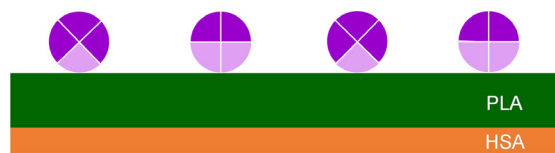

The percentage of active sites facing the aqueous phase: average 63%

**Fig. S2** The proposed geometries of  $\alpha$ GD absorbed statistically on the exterior surface of Cat MT.

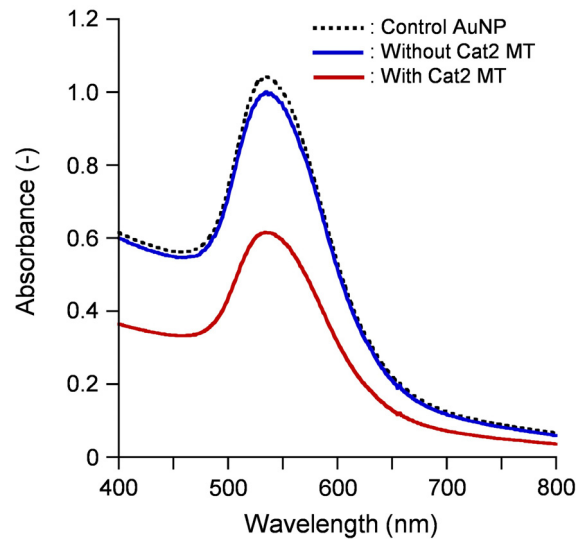

**Fig. S3** Visible absorption spectra of the AuNP dispersion (PB, pH 7.0) after the treatment with Cat2 MTs, with subsequent centrifugation.

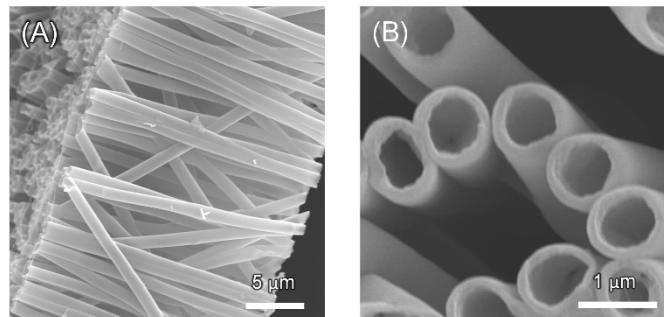

**Fig. S4** SEM images of (PLA/HSA)<sub>7</sub>PLA/PLG/Avi MTs.



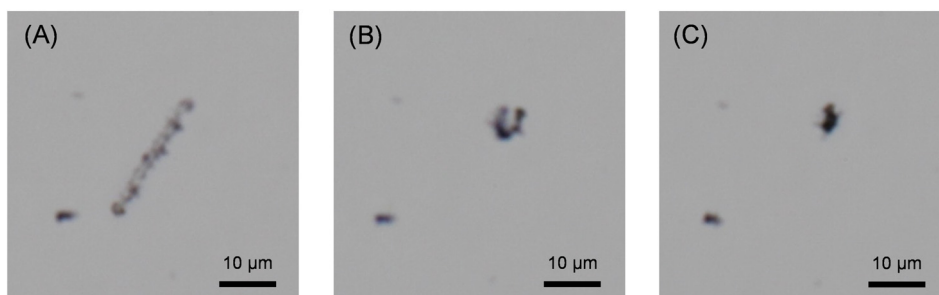

**Fig. S5** Morphology change of AuNP/Cat MT in Pronase solution (pH 7.5), (A) at 0 min, (B) after 15 min, and (C) after 2 h at 37 °C. The images were observed by optical microscopy.

**Video S1** Turning motion of self-propelled ConA/Cat MT by jetting O<sub>2</sub> bubbles in HEPES solution (pH 6.8, 10 mM, 2 wt% H<sub>2</sub>O<sub>2</sub>, 0.1 wt% Triton X-100) at 25 °C.

**Video S2** Turning motion of self-propelled αGD/Cat MT by jetting O<sub>2</sub> bubbles in PB solution (pH 7.0, 10 mM, 2 wt% H<sub>2</sub>O<sub>2</sub>, 0.1 wt% Triton X-100) at 25 °C.

**Video S3** Turning motion of self-propelled HRP/Cat MT by jetting O<sub>2</sub> bubbles in PB solution (pH 7.0, 10 mM, 2 wt% H<sub>2</sub>O<sub>2</sub>, 0.1 wt% Triton X-100) at 25 °C.

**Video S4** Turning motion of self-propelled AuNP/Cat MT by jetting O<sub>2</sub> bubbles in PB solution (pH 7.0, 10 mM, 2 wt% H<sub>2</sub>O<sub>2</sub>, 0.1 wt% Triton X-100); (A) without light irradiation, (B) under the light irradiation (139 mW/cm<sup>2</sup>) at room temperature.
